## Correction: Consumption of fruits and vegetables and risk of renal cell carcinoma: a meta-analysis of observational studies

Shaojin Zhang<sup>1</sup>, Zhankui Jia<sup>1</sup>, Zechen Yan<sup>1</sup> and Jinjian Yang<sup>1</sup>

<sup>1</sup> Department of Urology Surgery, The First Affiliated Hospital, Zhengzhou University, Zhengzhou, Henan Province, China

**Published:** August 07, 2018

**Copyright:** Zhang et al. This is an open-access article distributed under the terms of the Creative Commons Attribution License 3.0 (CC BY 3.0), which permits unrestricted use, distribution, and reproduction in any medium, provided the original author and source are credited.

**This article has been corrected:** The correct author name is given below:

**Shaojin Zhang**

Original article: Oncotarget. 2017; 8:27892-27903. <https://doi.org/10.18632/oncotarget.15841>
